# Supplementary material for: Combining the platinum(ii) drug candidate kiteplatin with 1,10-phenanthroline analogues
Source: Royal Society of Chemistry journal article supplement (doi:10.1039/c7dt04108j), 2017-11-27
Supplement: c7dt04108j1.pdf [file c7dt04108j1.pdf]

## Supporting Information - Combining the platinum(II) drug candidate kiteplatin with 1,10-phenanthroline analogues

Benjamin J. Pages,<sup>a</sup> Jennette Sakoff,<sup>b</sup> Jayne Gilbert,<sup>b</sup> Yingjie Zhang,<sup>c</sup> James D. Hoeschele,<sup>d</sup> Sharon M. Kelly,<sup>e</sup> and Janice R. Aldrich-Wright.\*<sup>a</sup>

<sup>a</sup> *Nanoscale Organisation and Dynamics Group, Western Sydney University, Campbelltown, NSW 2560, Australia*

<sup>b</sup> *Calvary Mater Newcastle, Waratah, NSW 2298, Australia*

<sup>c</sup> *Australian Nuclear Science and Technology Organisation, Locked Bag 2001, Kirrawee DC, NSW 2232, Australia*

<sup>d</sup> *Department of Chemistry, Eastern Michigan University, Ypsilanti, MI 48197, USA*

<sup>e</sup> *Institute of Molecular, Cell and Systems Biology, College of Medical, Veterinary and Life Sciences, University of Glasgow, Glasgow, G128QQ, United Kingdom.*

## Table of Contents

|                                                           |   |
|-----------------------------------------------------------|---|
| Section S1 – UV Spectra .....                             | 1 |
| Section S2 – NMR Spectra.....                             | 3 |
| S2.1. <sup>1</sup> H Spectra .....                        | 3 |
| S2.2. <sup>1</sup> H- <sup>195</sup> Pt HMQC spectra..... | 4 |
| Section S3 – ITC Data.....                                | 5 |

## Section S1 – UV Spectra

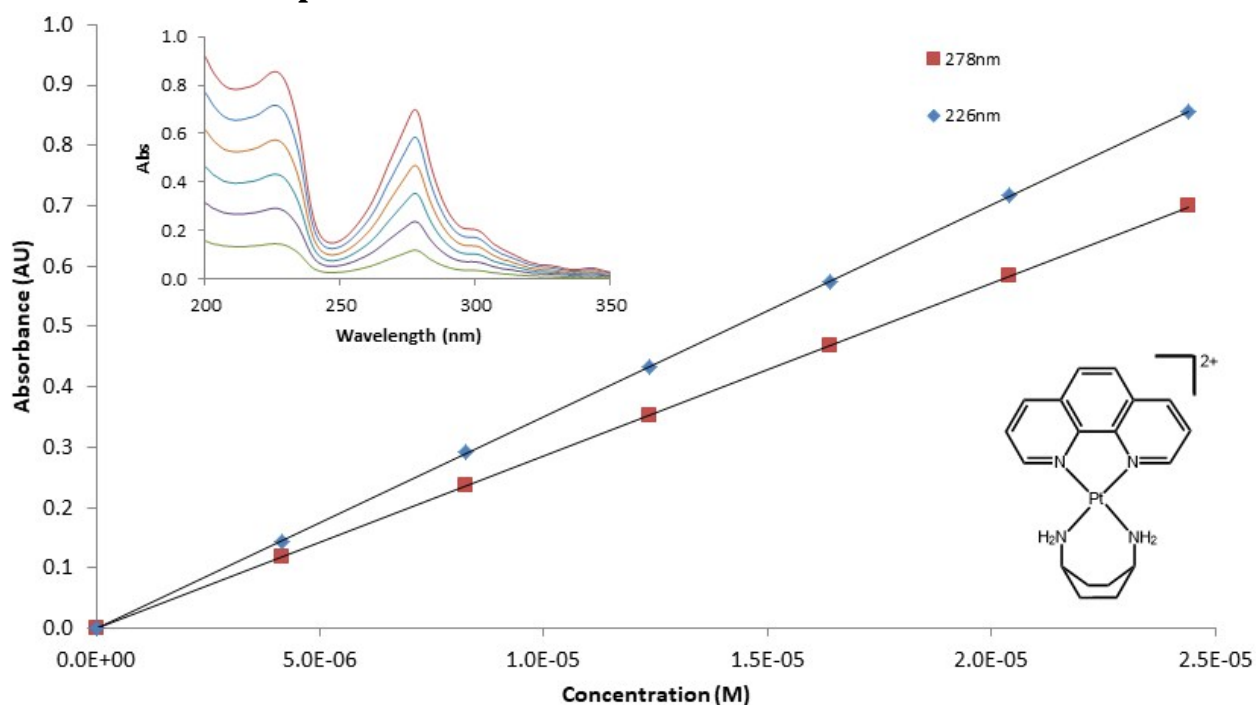

**Figure S1.1.** Standard absorbance plot of complex 1, obtained from the titration of the complex into water. Inset: the absorbance spectra recorded over the course of titrations.

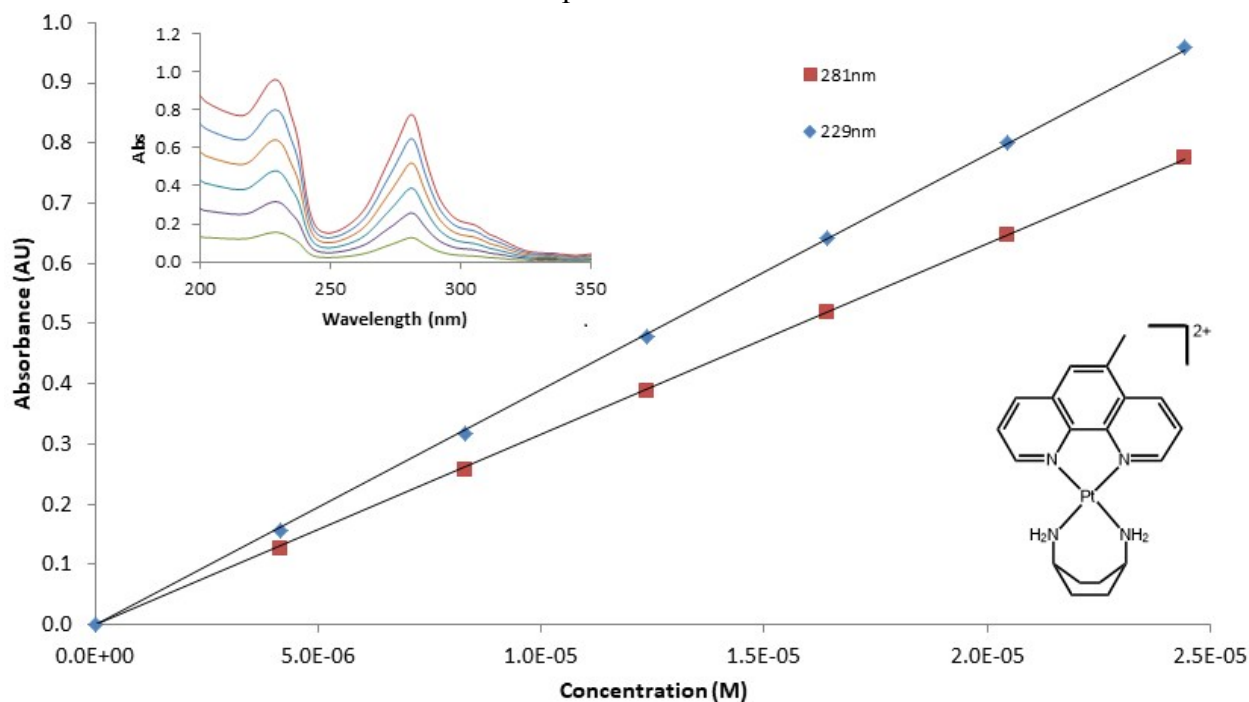

**Figure S1.2.** Standard absorbance plot of complex 2, obtained from the titration of the complex into water. Inset: the absorbance spectra recorded over the course of titrations.

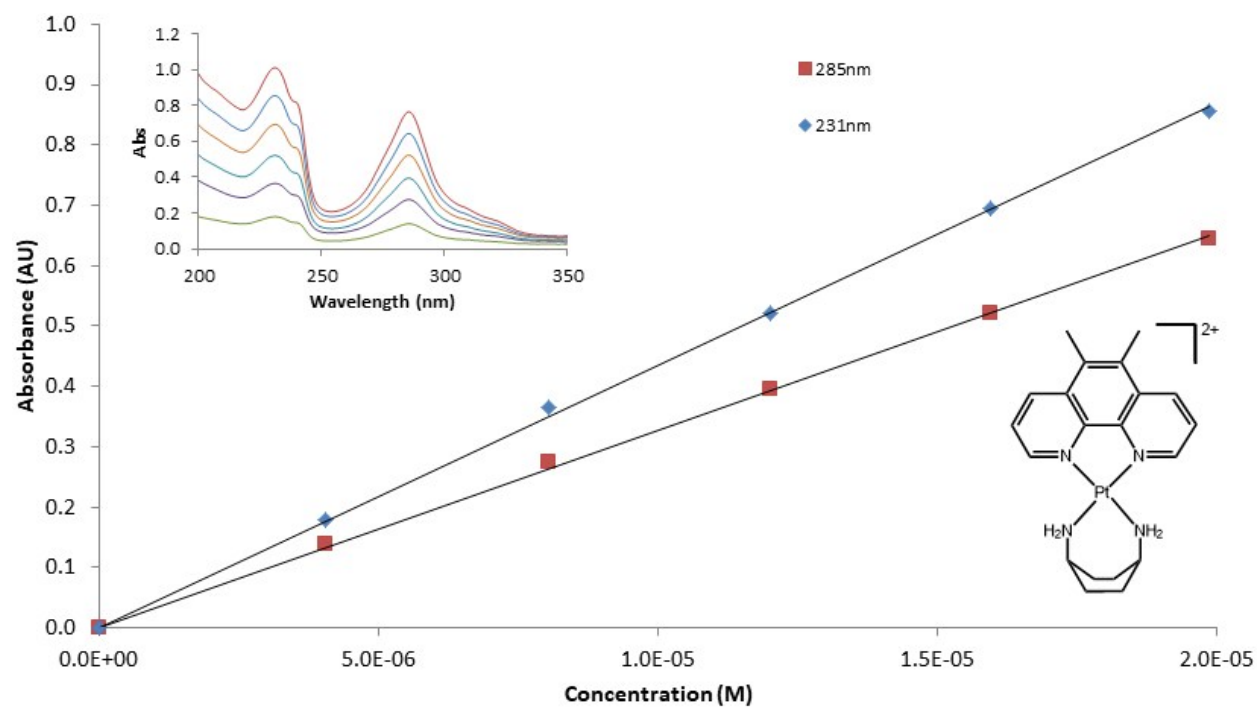

**Figure S1.2.** Standard absorbance plot of complex **3**, obtained from the titration of the complex into water. Inset: the absorbance spectra recorded over the course of titrations.

## Section S2 – NMR Spectra

### S2.1. $^1\text{H}$ Spectra

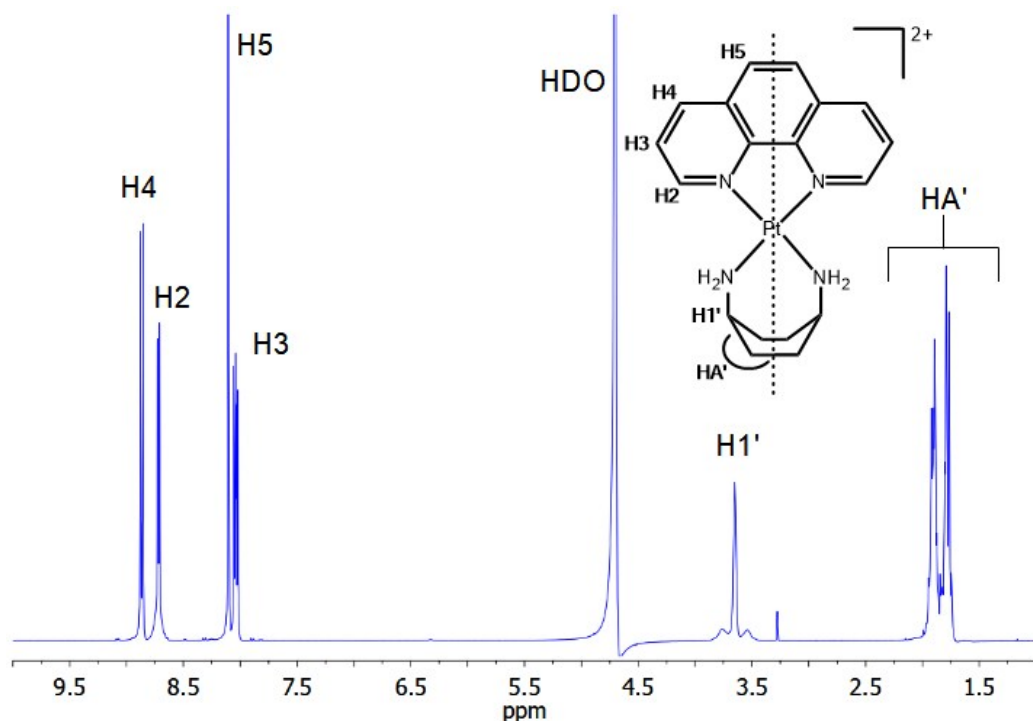

**Figure S2.1.1.** The  $^1\text{H}$  NMR spectrum of Complex 1 in  $\text{D}_2\text{O}$ , showing proton labels.

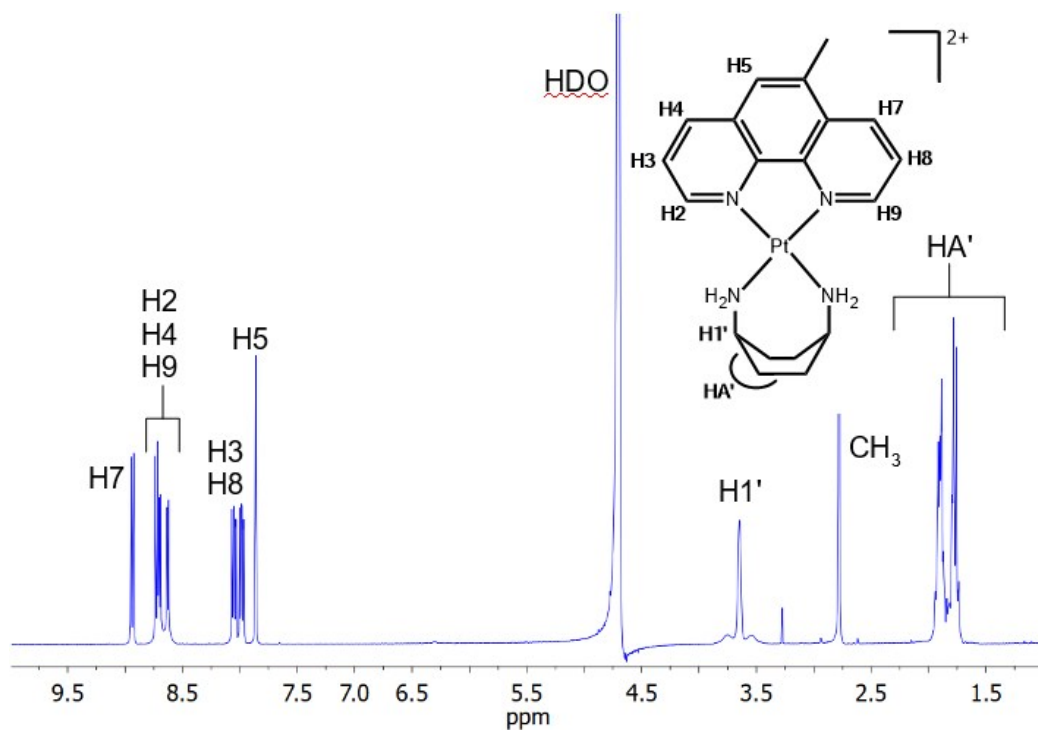

**Figure S2.1.2.** The  $^1\text{H}$  NMR spectrum of Complex 2 in  $\text{D}_2\text{O}$ , showing proton labels.

## S2.2. $^1\text{H}$ - $^{195}\text{Pt}$ HMQC spectra

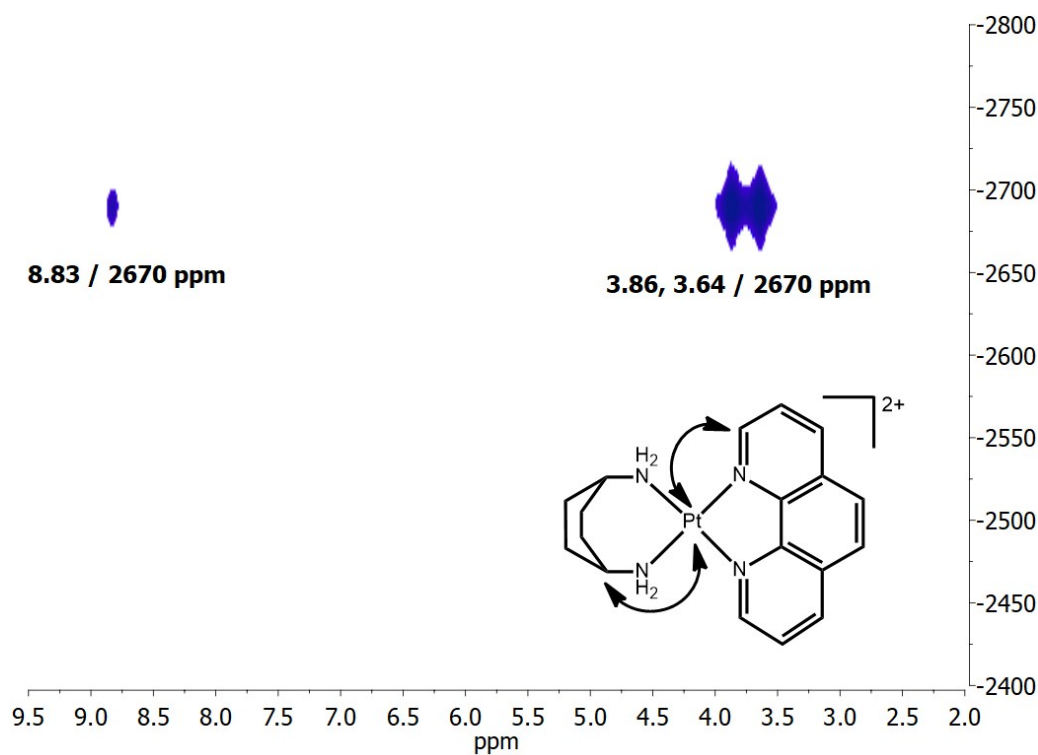

**Figure S2.2.1.** The  $^1\text{H}$ - $^{195}\text{Pt}$  HMQC spectrum of complex **1** in  $\text{D}_2\text{O}$ , showing cross-peaks.

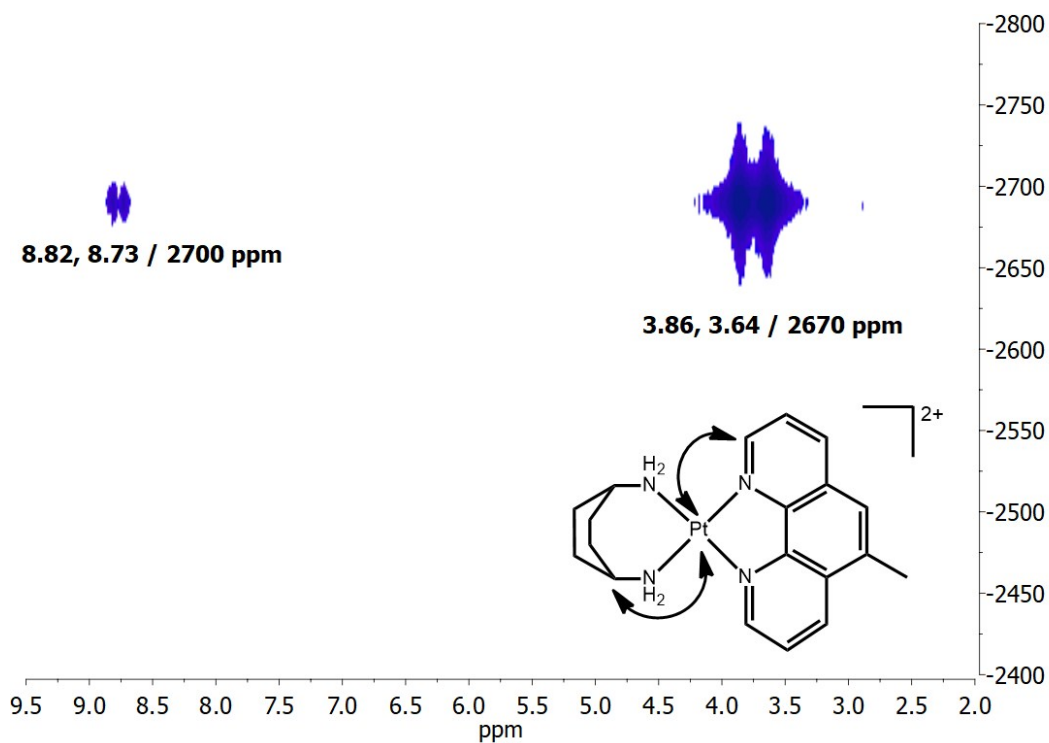

**Figure S2.2.2.** The  $^1\text{H}$ - $^{195}\text{Pt}$  HMQC spectrum of complex **2** in  $\text{DMSO-d}_6$ , showing cross-peaks.

### Section S3 - ITC Data

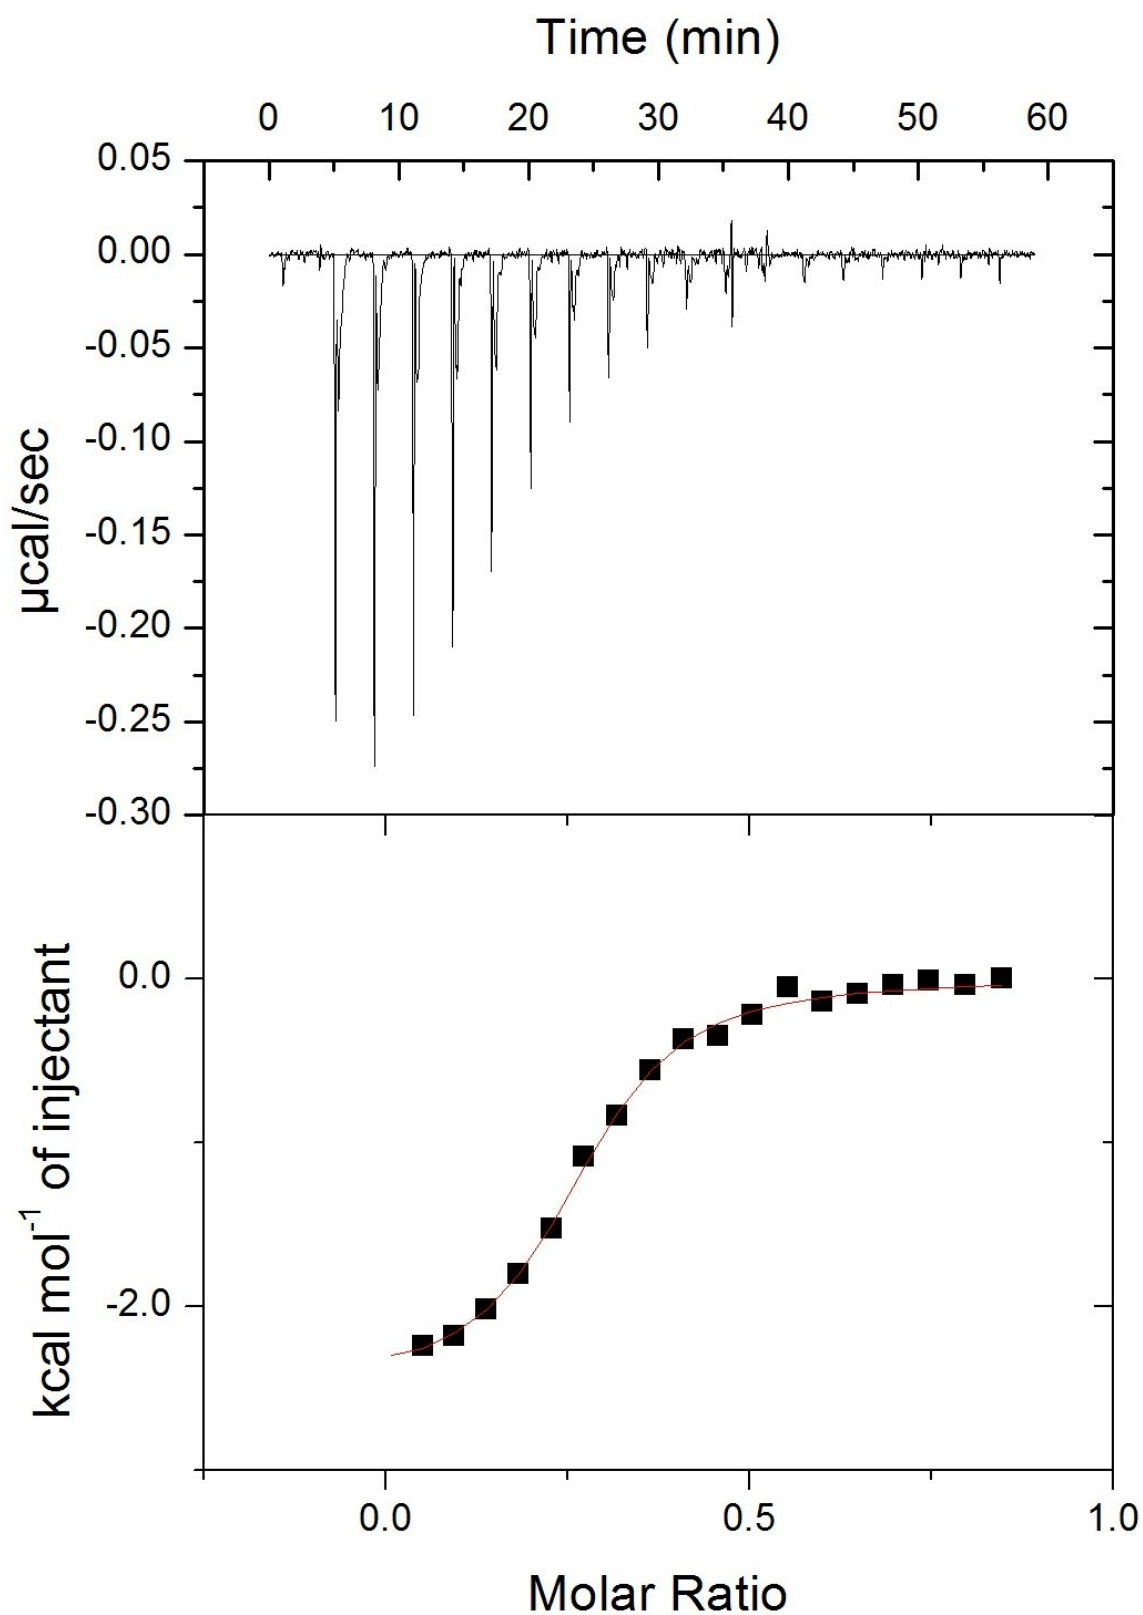

**Figure S3.1.** ITC trace and binding curve of the titration of PHENKITE or complex **1** ( $750\ \mu\text{M}$ ) into CT-DNA ( $160\ \mu\text{M}$ ). Fits were obtained using a one-site binding model.

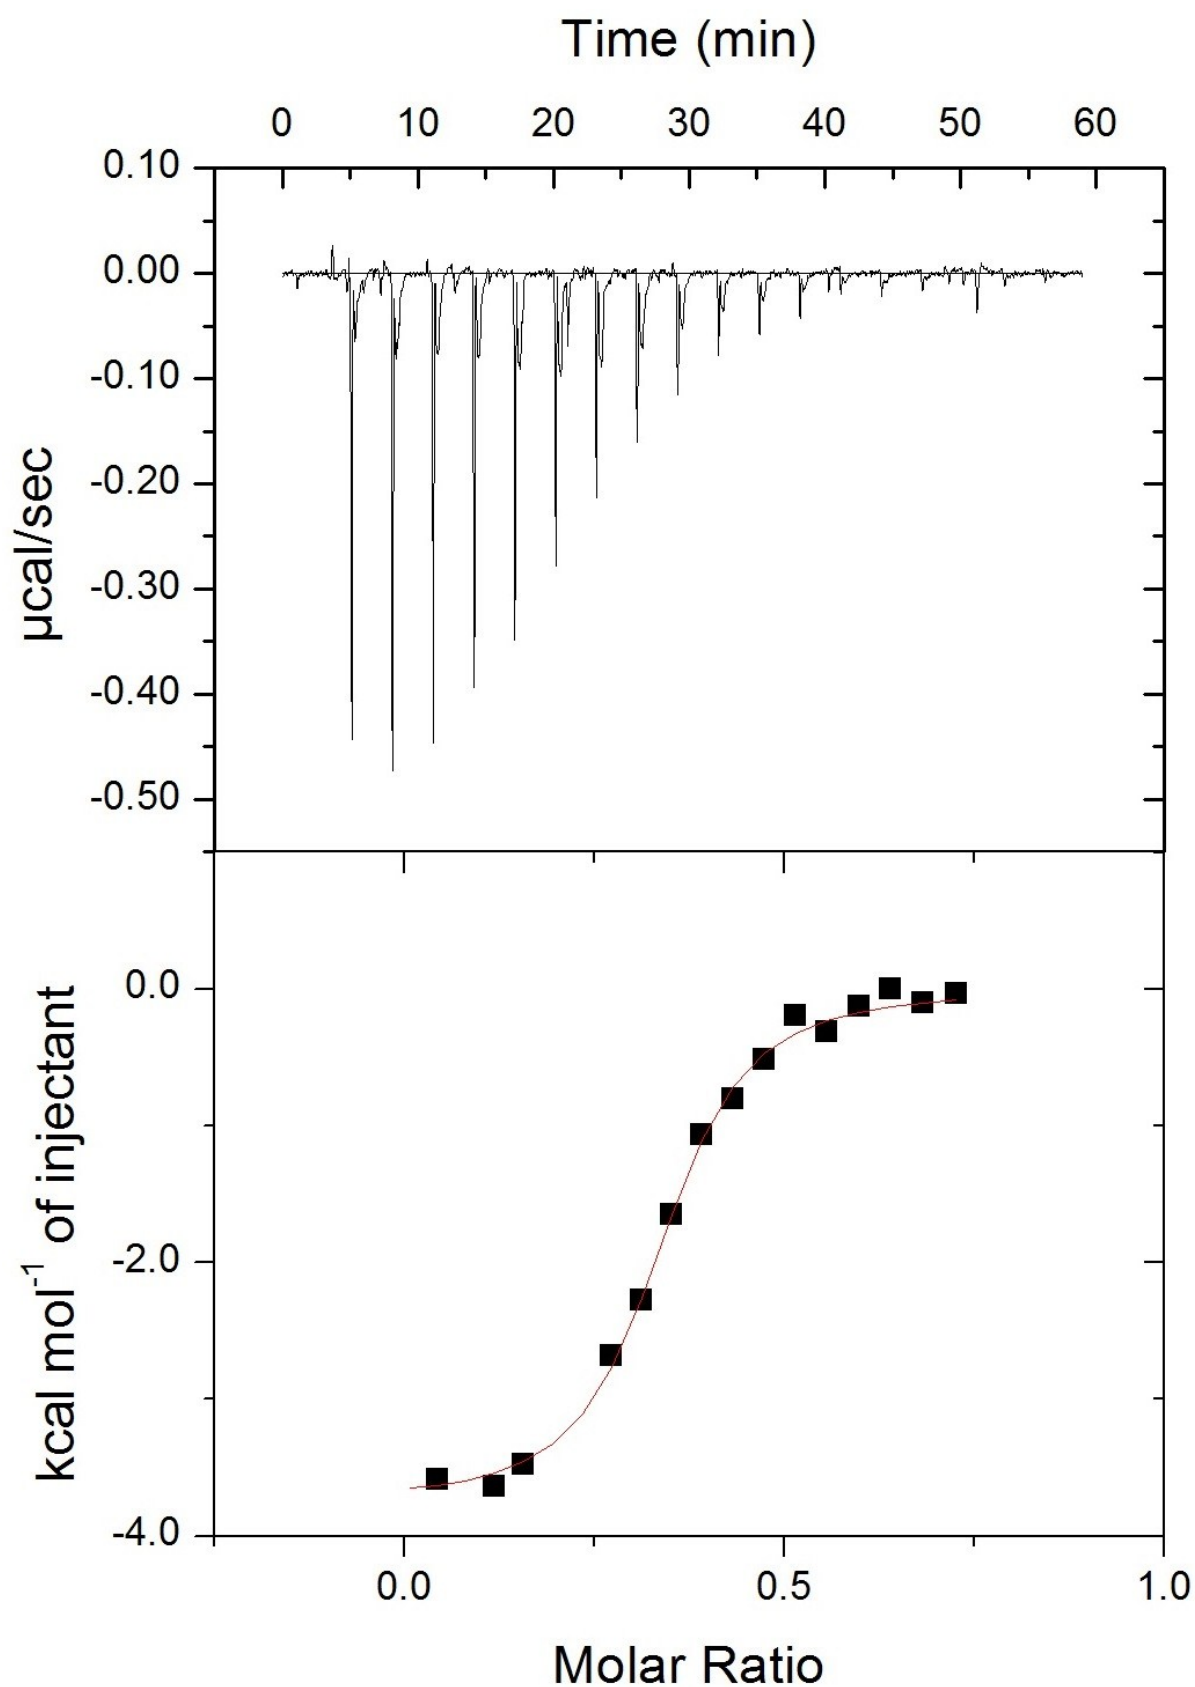

**Figure S3.2.** ITC trace and binding curve of the titration of 5KITE or complex **2** (600  $\mu\text{M}$ ) into CT-DNA (160  $\mu\text{M}$ ). Fits were obtained using a one-site binding model.

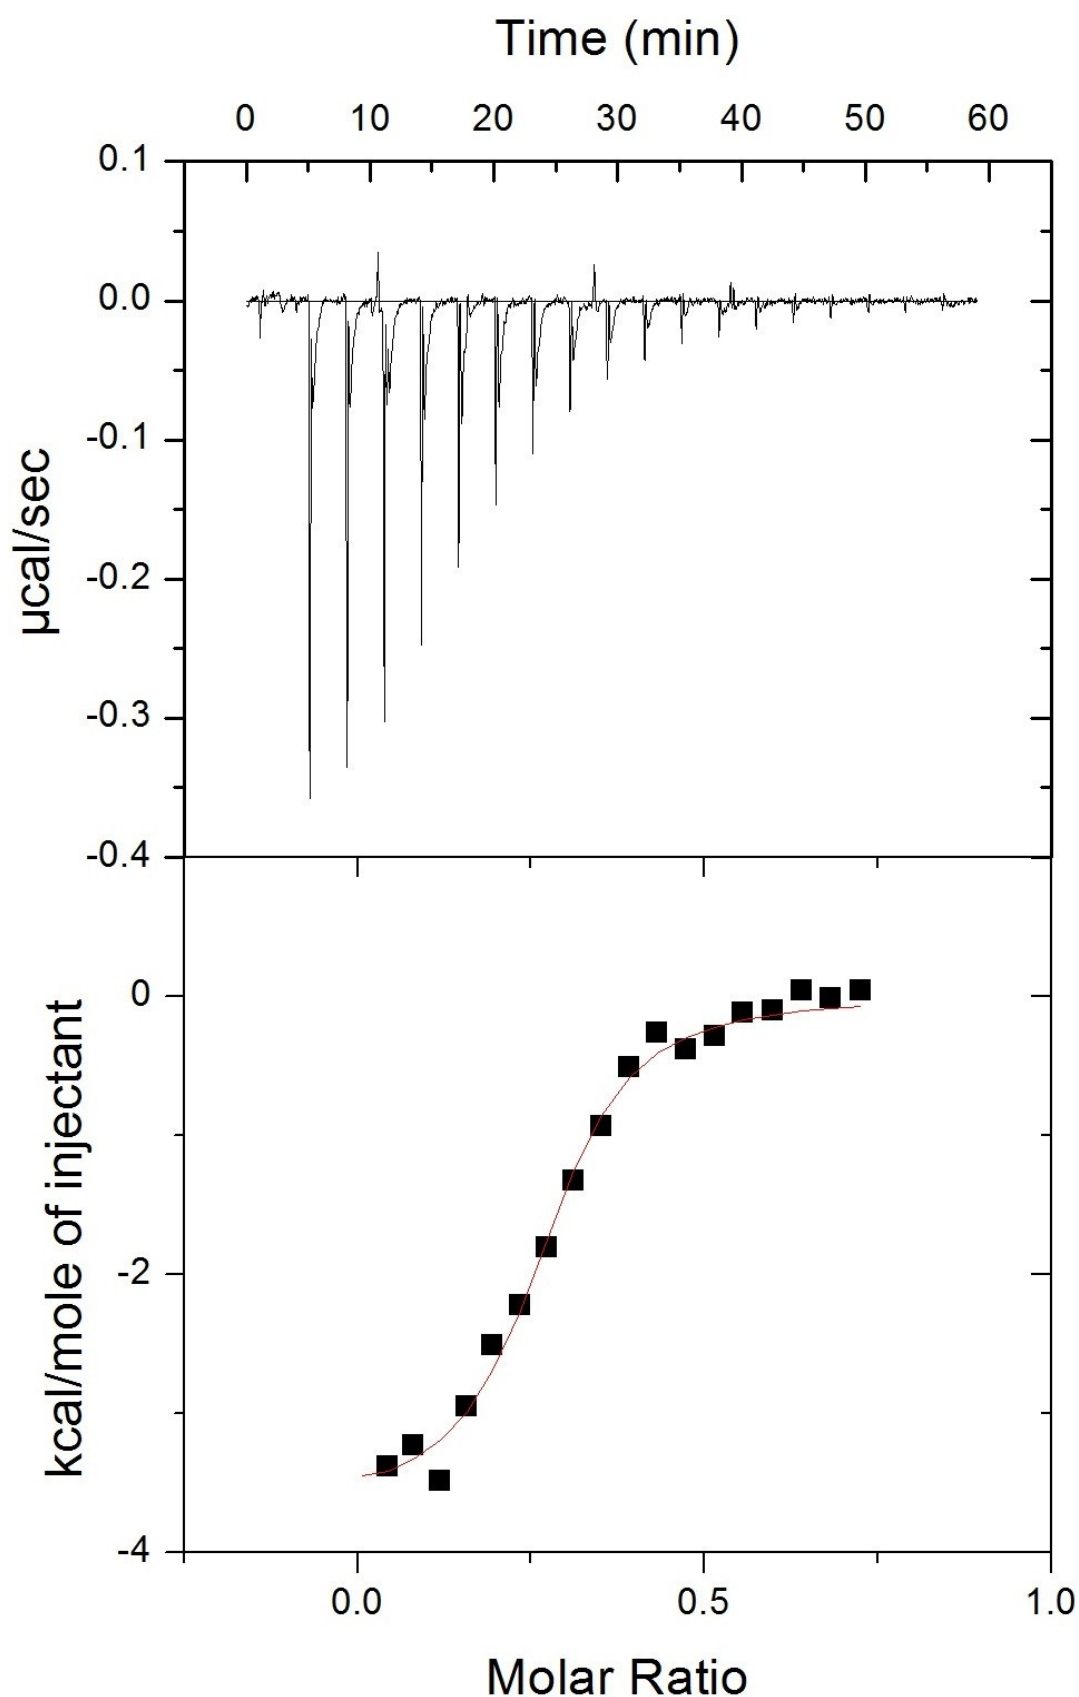

**Figure S3.3.** ITC trace and binding curve of the titration of 5MESS chloride or complex **5** (600  $\mu\text{M}$ ) into CT-DNA (160  $\mu\text{M}$ ). Fits were obtained using a one-site binding model.

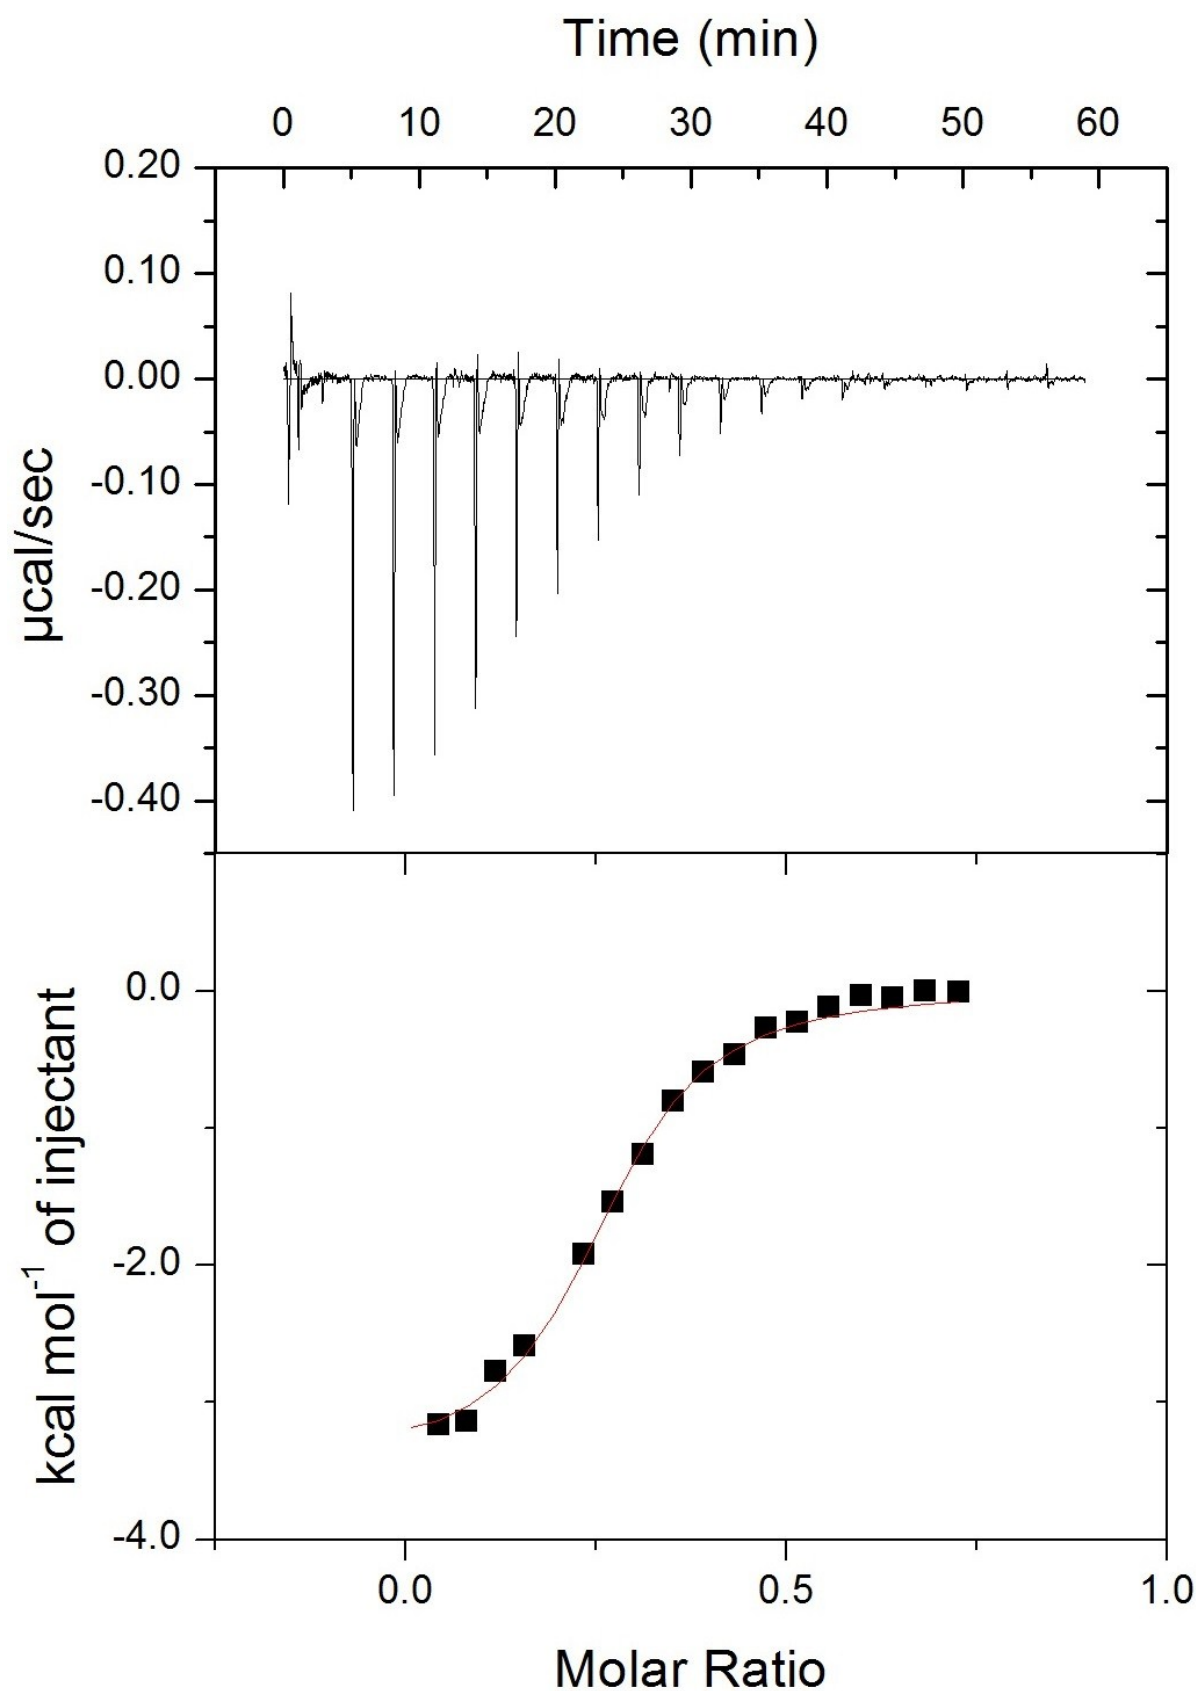

**Figure S3.4.** ITC trace and binding curve of the titration of 5MESS nitrate or complex **5a** (600  $\mu\text{M}$ ) into CT-DNA (160  $\mu\text{M}$ ). Fits were obtained using a one-site binding model.
